# Supplementary material for: Vaginal delivery of mucus-penetrating organic nanoparticles for photothermal therapy against cervical intraepithelial neoplasia in mice
Source: Royal Society of Chemistry journal article supplement (doi:10.1039/c9tb00984a), 2019-01-01
Supplement: c9tb00984a1.pdf [file c9tb00984a1.pdf]

## Vaginal delivery of mucus-penetrating organic nanoparticles for photothermal therapy against cervical intraepithelial neoplasia in mice

Xue Wang<sup>a</sup>, Li Fu<sup>c</sup>, Wenhai Lin<sup>b</sup>, Wei Zhang<sup>b</sup>, Qing Pei<sup>b</sup>, Xiaohua Zheng<sup>b</sup>, Shi Liu<sup>b\*</sup>, Tao Zhang<sup>a\*</sup>, Zhigang Xie<sup>b</sup>

<sup>a</sup>China-Japan Union Hospital, Jilin University, Changchun 130033, P. R. China

<sup>b</sup>State Key Laboratory of Polymer Physics and Chemistry, Changchun Institute of Applied Chemistry, Chinese Academy of Sciences, P. R. China

<sup>c</sup>Department of Implantology, Stomatological Hospital, Jilin University, Changchun 130021, P. R. China

### EXPERIMENT SECTION

**Calculation of photothermal conversion efficiency ( $\eta$ ).** The photothermal conversion efficiency ( $\eta$ ) was calculated according to the equation (Eq) as follows

$$\eta = \frac{hA\Delta T_{max} - Q_s}{I(1 - 10^{-A_\lambda})}$$

according to previous work<sup>5</sup>: (1), where  $h$  is the heat transfer coefficient,  $A$  is the surface area of the container,  $\Delta T_{max}$  is the maximum temperature change,  $I$  is the laser power,  $A_\lambda$  is the absorbance at 604 nm,  $Q_s$  is the heat associated with the light absorbance of the solvent. In to get the  $\theta$  defined as the ratio of  $\Delta T$

$$\theta = \frac{\Delta T}{\Delta T_{max}}$$

to  $\Delta T_{max}$  was introduced:

$$\text{Based on the total energy balance for this system: } \sum_i m_i C_{p,i} \frac{dT}{dt} = Q_{NPs} + Q_s - Q_{loss}$$

(2), where  $Q_{NPs}$  is the photothermal energy input by PEG<sub>800</sub>-BDP/NPs,  $Q_s$  is the heat associated with the light absorbance of the solvent,  $Q_{loss}$  is thermal energy lost to the surroundings. At the maximum steady-state temperature, the heat input is equal to the heat output:  $Q_{NPs} + Q_s = Q_{loss} = hA\Delta T_{max}$ .

$$\text{Substituting } \theta \text{ into Eq.2 and rearranging: } \frac{d\theta}{dt} = \frac{hA}{\sum_i m_i C_{p,i}} \left( \frac{Q_{NPs} + Q_s}{hA\Delta T_{max}} - \theta \right) \quad (3),$$

When the laser was shut off, the  $Q_{NPs} + Q_s = 0$ , Eq.3 changed to:  $dt = -\frac{\sum_i m_i C_{p,i} d\theta}{hA \theta}$   
(4).

Integrating Eq.4 gives the expression:  $t = -\frac{\sum_i m_i C_{p,i}}{hA} \theta$ . Then  $hA$  can be determined by applying the linear time data from the cooling period versus  $-\ln\theta$ .

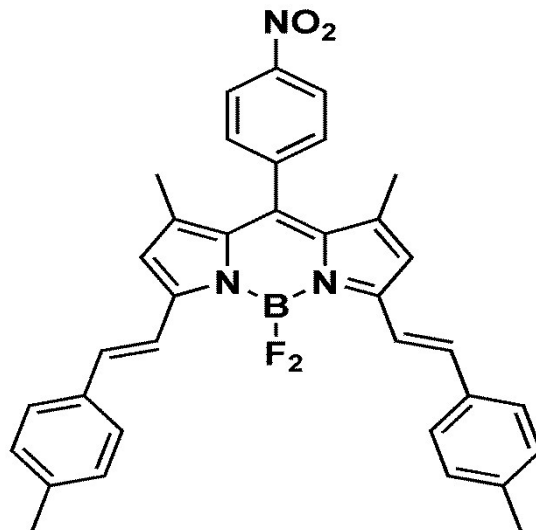

Fig.S1 Structure of BDP without the two alkane chains.

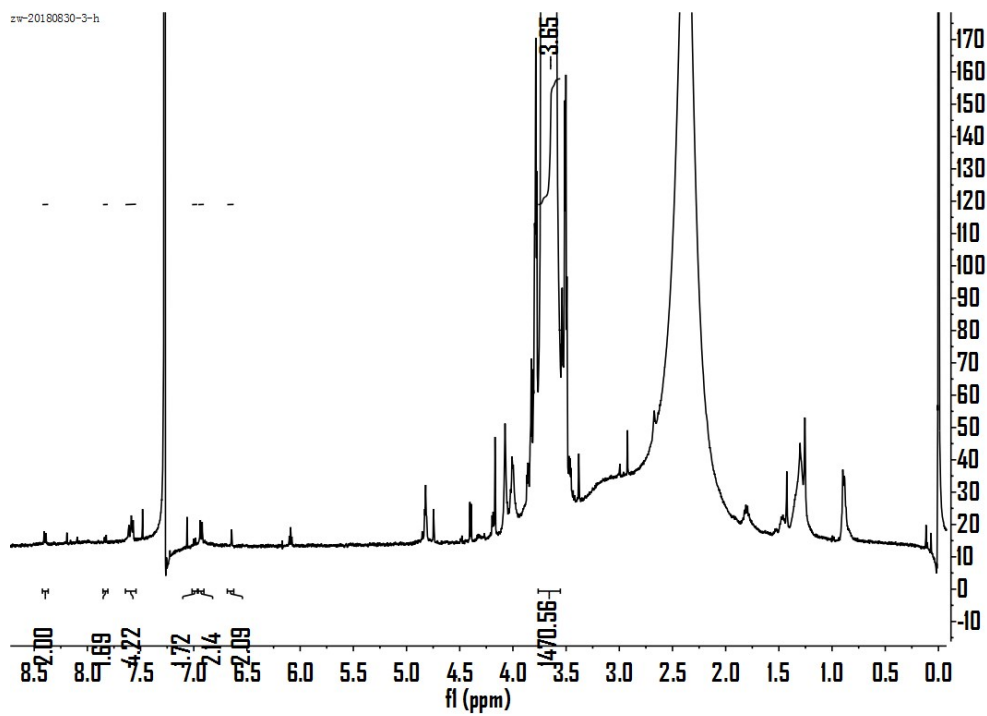

Fig.S2  $^1\text{H}$  NMR spectra of PEG800-BDP/NPs.

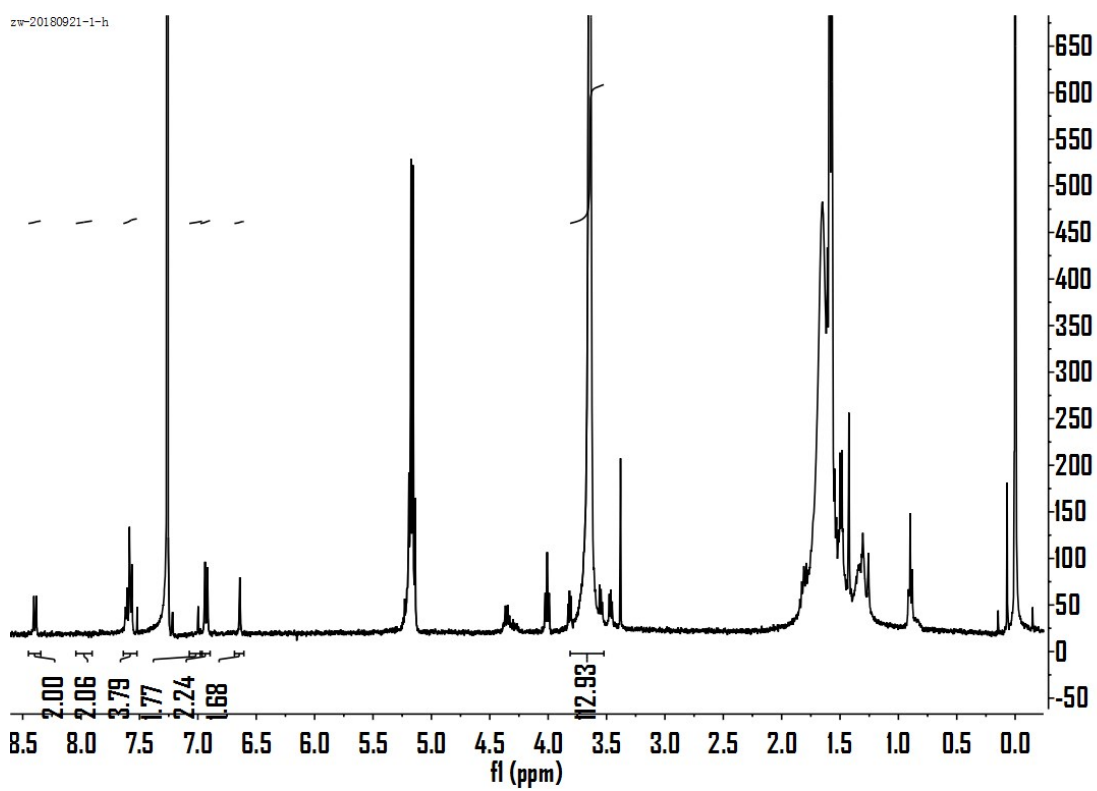

Fig.S3  $^1\text{H}$  NMR spectra of BDP/M.

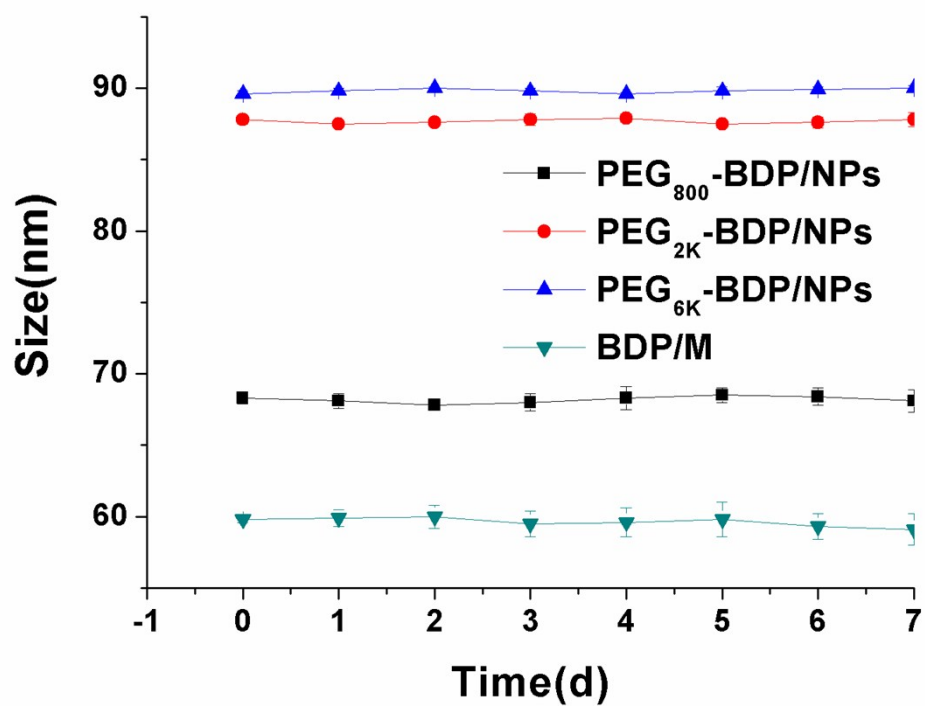

Figure S4. Size changes of PEG<sub>800</sub>-BDP/NPs, PEG<sub>2K</sub>-BDP/NPs, PEG<sub>6K</sub>-BDP/NPs and BDP/M in acetate buffer (pH 5) solutions..

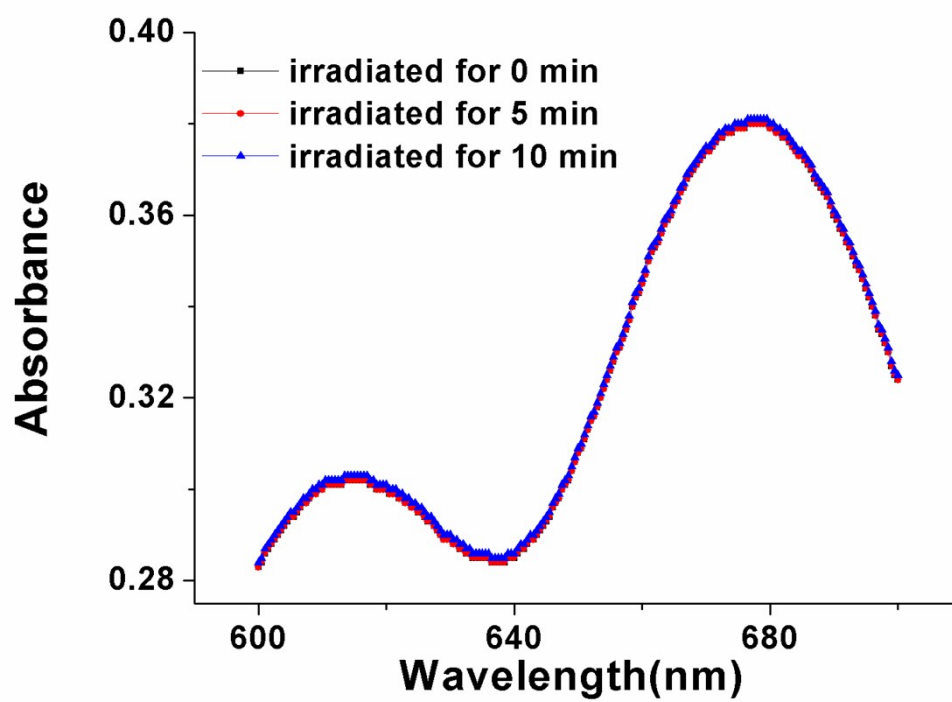

Figure S5. Absorption spectra of PEG<sub>800</sub>-BDP/NPs solutions before and after 650 nm laser irradiation at a power density of 1W/cm<sup>2</sup> for 10 min.

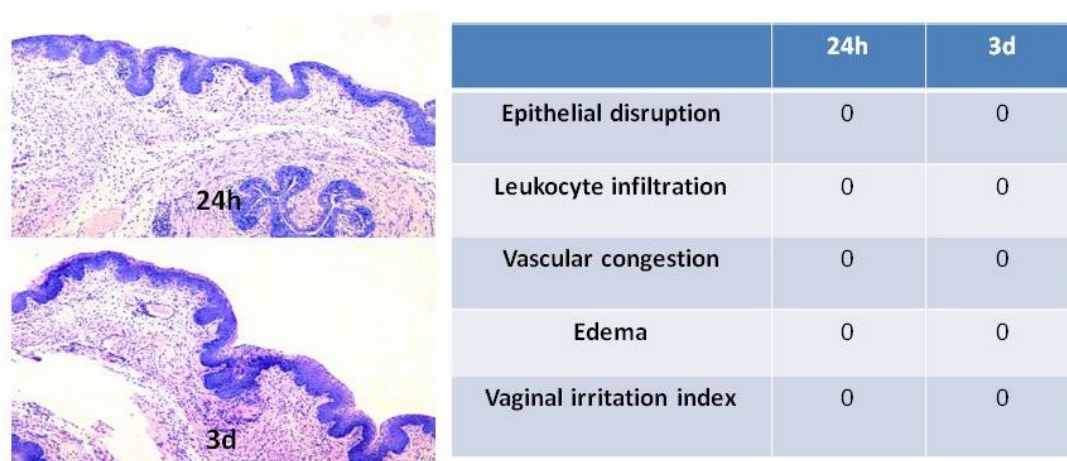

Fig.S6 Local irritation evaluation: (A) histological microscopy of vaginal mucosa of mice in PTT group or PEG<sub>800</sub>-BDP/NPs group; (B) Histopathological examination of vaginal tissues. Individual score: 0 = absence, 1 = minimal, 2 = mild, 3 = moderate, 4 = severe irritation. The cumulative score were correlated to human vaginal irritation potential as follows: vaginal irritation index  $\leq 8$ : acceptable; 9–10: borderline;  $\geq 11$ : unacceptable.

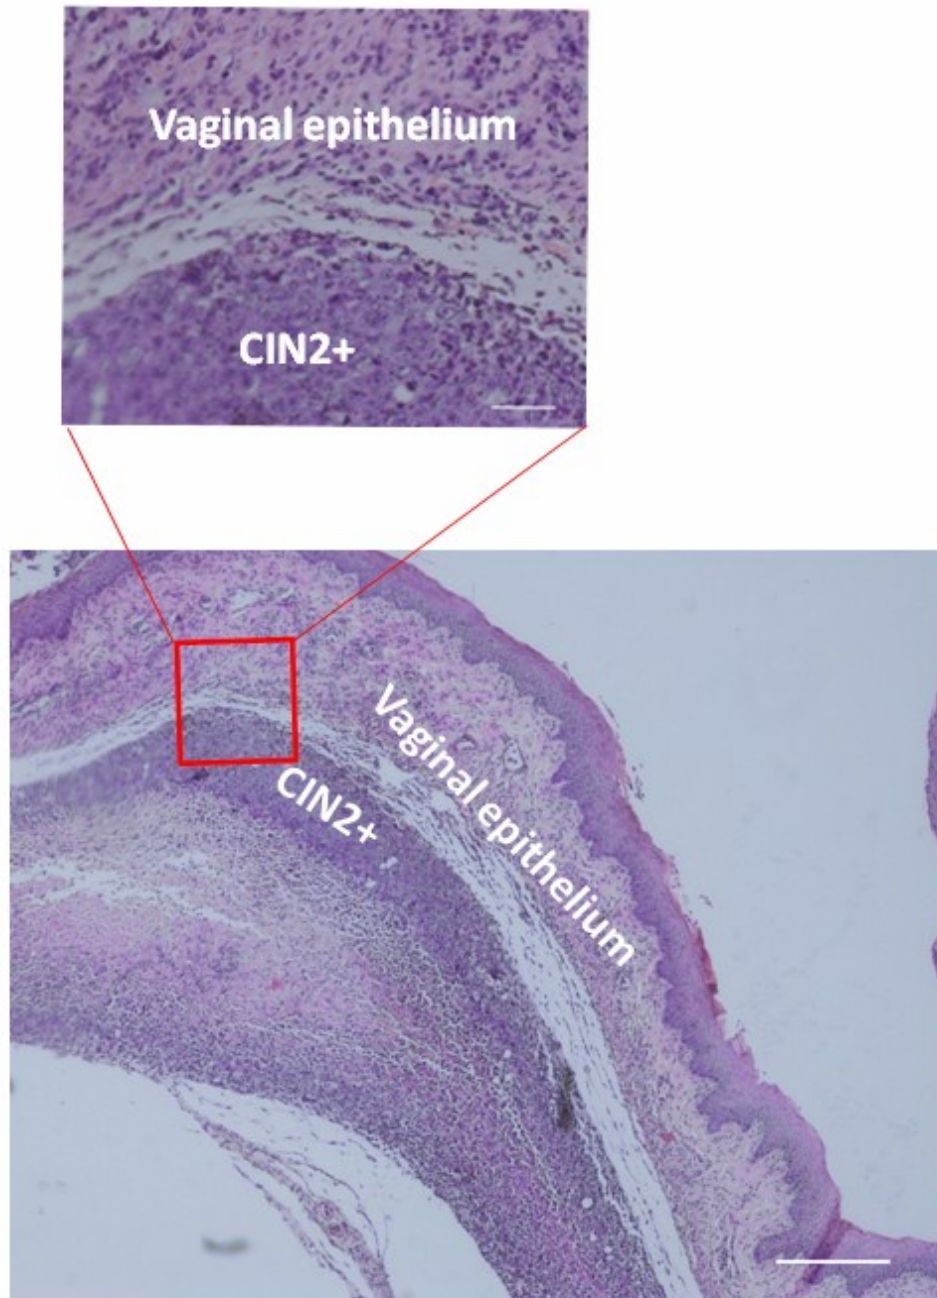

Figure S7. H&E picture of CIN2+. Bar=100  $\mu$  m

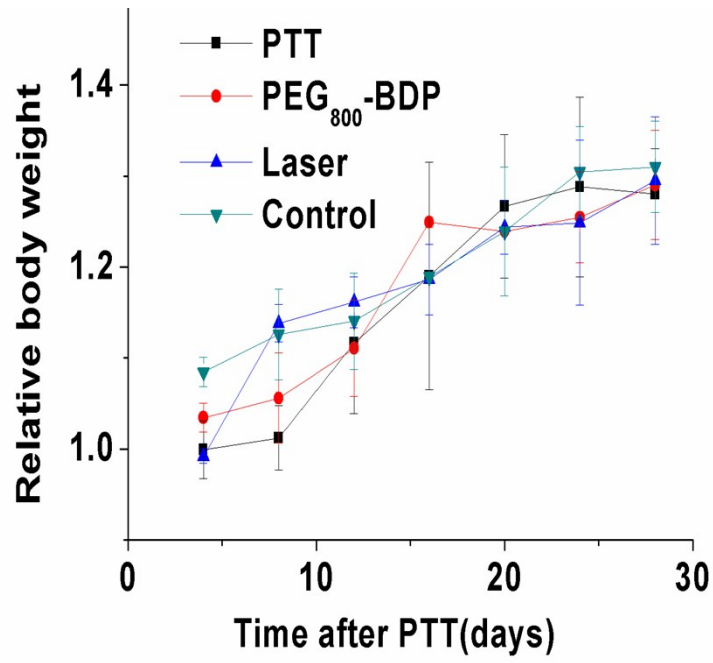

Figure S8. Changes in body weight of mice in mice after PTT.

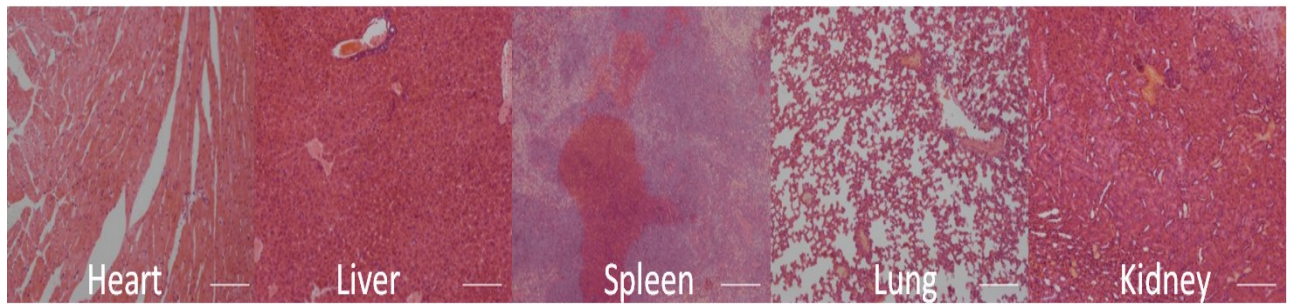

Figure S9. Histological analysis of main organs of mice 33 days after PTT.
